# Supplementary material for: Proteostatic modulation in brain aging without associated Alzheimer’s disease-and age-related neuropathological changes
Source: Aging (Albany NY). 2023 May 13;15(9):3295–330. doi: 10.18632/aging.204698 (PMC10449282; doi:10.18632/aging.204698)
Supplement: Supplementary Figure 1 [file aging-15-204698-s001.pdf]

## SUPPLEMENTARY FIGURE

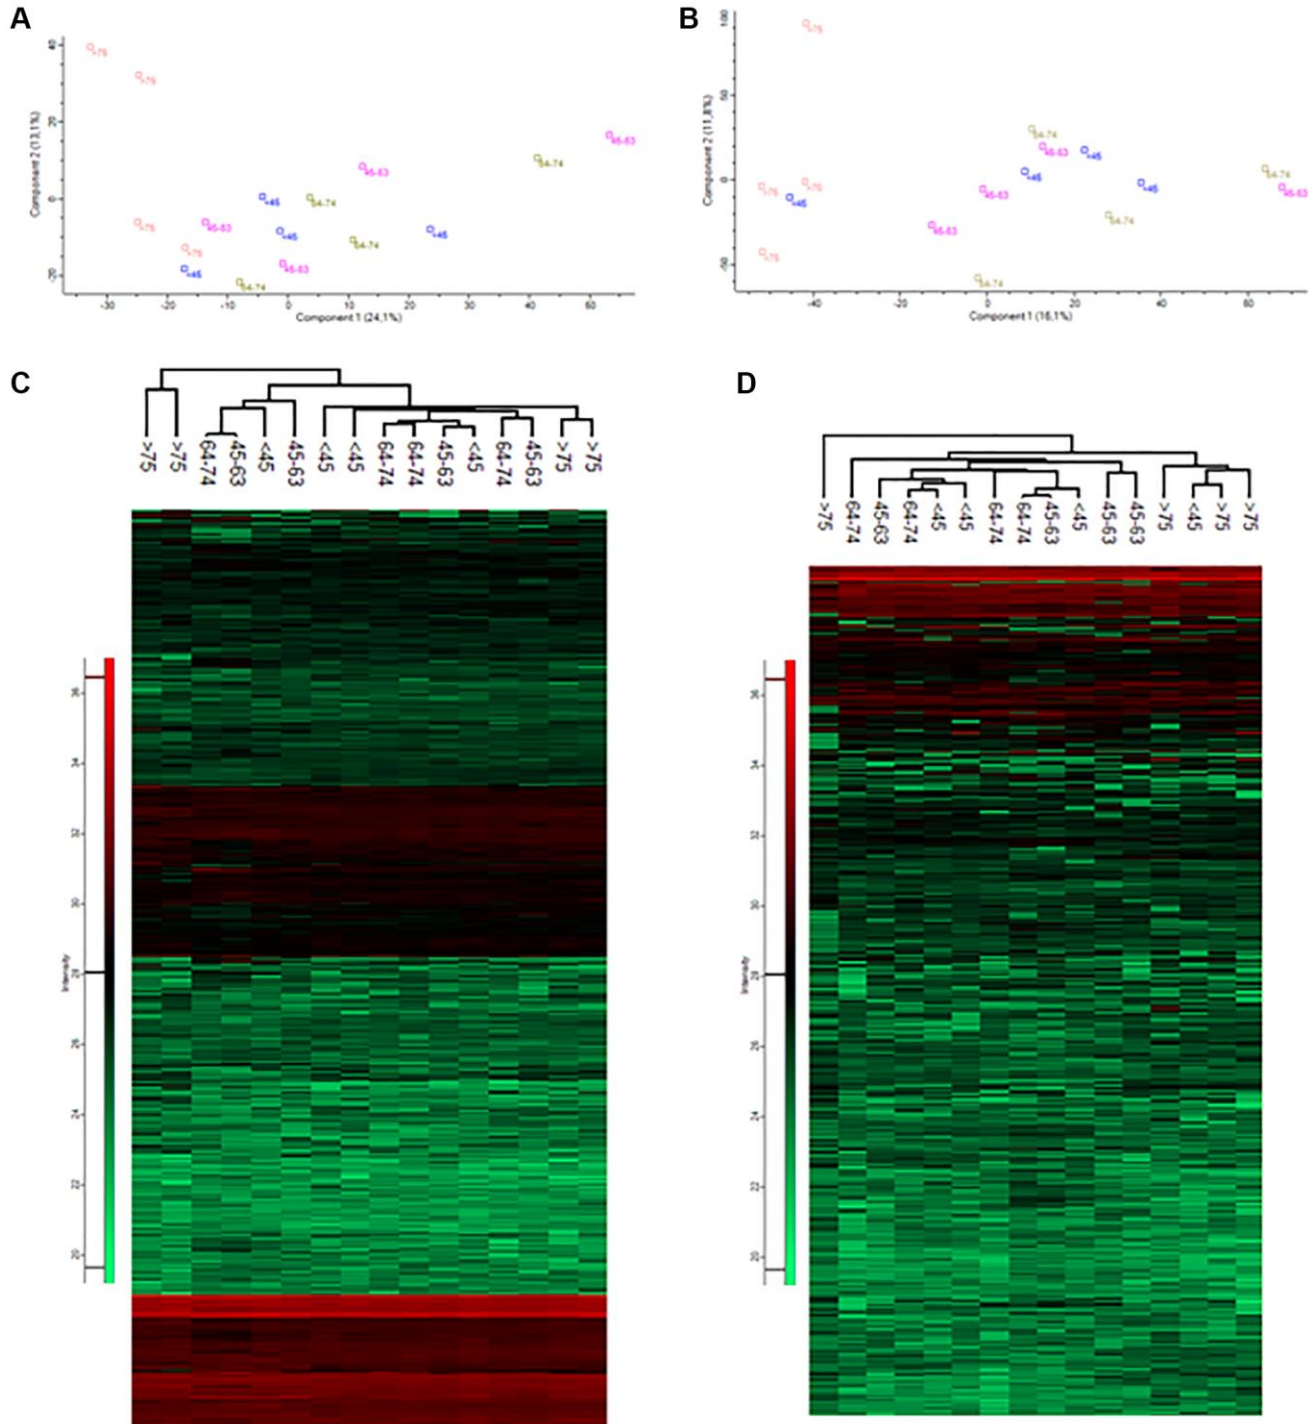

**Supplementary Figure 1. Proteomic and phosphoproteomic global analysis.** (A, B) Principal component (PCA) analysis representing all 16 samples at the proteome (A) and phosphoproteome (B) levels. (C, D) Heatmaps representing the total number of quantified proteins at the proteome (C) and phosphoproteome (D) across all age groups.
