# Supplementary material for: Proteostatic modulation in brain aging without associated Alzheimer’s disease-and age-related neuropathological changes
Source: Aging (Albany NY). 2023 May 13;15(9):3295–330. doi: 10.18632/aging.204698 (PMC10449282; doi:10.18632/aging.204698)
Supplement: Supplementary Table 1 [file aging-15-204698-s002.xlsx]

## Sheet: Hoja1
Supplementary Table 1. Cluster list composition.
fosfo		total
C: Cluster	T: Gene Name (primary)	C: Cluster	T: Gene Name (primary)
Cluster1	MAP2	Cluster1	KIF2A
Cluster1	TMEM94	Cluster1	SAR1A
Cluster1	KIAA1107	Cluster1	TAOK1
Cluster1	EPB41L3	Cluster1	EIF2B3
Cluster1	EPB41L3	Cluster1	PICALM
Cluster1	MINK1	Cluster1	PRXL2B
Cluster1	RASGRF1	Cluster1	PUDP
Cluster1	MARCKS	Cluster1	PGP
Cluster1	STX1B	Cluster1	COPS8
Cluster1	PPIL3	Cluster1	KLK6
Cluster1	ATP2B2	Cluster1	FAM117A
Cluster1	PKP4	Cluster1	UCHL3
Cluster1	SYNGR3	Cluster1	MOG
Cluster1	ABCC8	Cluster1	PBXIP1
Cluster1	ASIC2	Cluster1	AGFG1
Cluster1	ABCC8	Cluster1	EIF2S3
Cluster1	RAP1GAP2	Cluster1	RTRAF
Cluster1	SGIP1	Cluster1	CACYBP
Cluster1	SNAP91	Cluster1	AHSA1
Cluster1	SNAP91	Cluster1	UBA6
Cluster1	DOCK4	Cluster1	GLRX
Cluster1	NEDD4L	Cluster1	RABGEF1
Cluster1	PLXNA1	Cluster1	COPS4
Cluster1	MAP2	Cluster1	CLDN11
Cluster1	SRCIN1	Cluster1	ARR3
Cluster1	VIM	Cluster1	GLIPR2
Cluster1	ANK2	Cluster1	LSM8
Cluster1	PML	Cluster1	PAFAH1B2
Cluster1	MARCKS	Cluster1	UFM1
Cluster1	ANK2	Cluster1	CLTB
Cluster1	EPB41L3	Cluster1	TKFC
Cluster1	ANK2	Cluster1	CMPK1
Cluster1	BCAS3	Cluster1	CPPED1
Cluster2	RETREG2	Cluster1	PMP2
Cluster2	ADD2	Cluster1	COPS3
Cluster2	PCLO	Cluster1	AGAP1
Cluster2	UBE4B	Cluster1	PDCD5
Cluster2	PRKCD	Cluster1	FCSK
Cluster2	PRKCD	Cluster1	PRKAR1B
Cluster2	RAB3IP	Cluster1	MTURN
Cluster2	RIMS1	Cluster1	DDT
Cluster2	MTCH1	Cluster1	PEF1
Cluster2	NUMBL	Cluster1	CAB39
Cluster2	PPP3CB	Cluster1	KPNA3
Cluster2	JAKMIP3	Cluster1	SUGT1
Cluster2	UBR4	Cluster1	S100B
Cluster2	AATK	Cluster1	ENOPH1
Cluster2	KCNB1	Cluster1	BCAS1
Cluster2	CEP170B	Cluster1	PLP1
Cluster2	TMCC1	Cluster1	PGRMC2
Cluster2	ADD1	Cluster1	CD9
Cluster2	ANK2	Cluster1	PROX1
Cluster2	BASP1	Cluster1	LSM3
Cluster2	TPRG1L	Cluster1	LIPE
Cluster2	NDRG1	Cluster1	OMG
Cluster2	PSD3	Cluster1	KPNA6
Cluster2	PIP4P2	Cluster1	DPY30
Cluster2	TBC1D5	Cluster1	TPPP3
Cluster2	PACSIN1	Cluster1	PADI2
Cluster2	RTN1	Cluster1	CARNS1
Cluster2	PRUNE2	Cluster1	SLC14A1
Cluster2	STXBP1	Cluster1	GPD1
Cluster2	NDEL1	Cluster1	NMT1
Cluster2	ARFGAP1	Cluster1	UBQLN1
Cluster2	CCDC177	Cluster1	HARS1
Cluster2	ATP2B2	Cluster1	GATD1
Cluster2	RALGAPA1	Cluster1	CARHSP1
Cluster2	SH3KBP1	Cluster1	CLASP2
Cluster2	NDEL1	Cluster1	CRKL
Cluster2	ANKS1B	Cluster1	TXNDC17
Cluster2	EPB41L3	Cluster1	SLC25A1
Cluster2	FGF12	Cluster1	SHTN1
Cluster2	EHD3	Cluster1	ABCA2
Cluster2	EPB41L1	Cluster1	ERMN
Cluster2	PPFIA3	Cluster1	CSE1L
Cluster2	BRSK2	Cluster1	HIP1R
Cluster2	EPB41L1	Cluster1	COPZ1
Cluster2	ZDHHC5	Cluster1	DCUN1D1
Cluster2	SHISA6	Cluster1	MT-ND5
Cluster2	SYNJ1	Cluster1	SPTAN1
Cluster2	VAPB	Cluster1	YKT6
Cluster2	SORBS1	Cluster1	TRIM36
Cluster2	R3HDM2	Cluster1	PAK6
Cluster2	SRGAP2	Cluster1	ARL15
Cluster2	LUZP1	Cluster1	NECAP1
Cluster2	PCLO	Cluster1	KDM5B
Cluster2	PI4KA	Cluster1	PRMT5
Cluster2	PCLO	Cluster1	GRB2
Cluster2	GIT1	Cluster1	SLC24A2
Cluster2	SH2D5	Cluster1	RAD23B
Cluster2	MAP1B	Cluster1	STK24
Cluster2	ANK2	Cluster1	RAP1GDS1
Cluster2	ANK2	Cluster1	GMFB
Cluster2	ANK2	Cluster1	MAP7D1
Cluster2	ANK2	Cluster1	ANKHD1
Cluster2	MAP1B	Cluster1	ACP1
Cluster2	ANK2	Cluster1	ELAVL2
Cluster2	SGSM1	Cluster1	RIC8A
Cluster2	EXOC2	Cluster1	B4GAT1
Cluster2	EPB41L3	Cluster1	UBE2K
Cluster2	SH3PXD2A	Cluster1	ADSS2
Cluster2	ANK2	Cluster1	SH3BGRL3
Cluster2	HMGCS1	Cluster1	PAIP1
Cluster2	MCRIP1	Cluster1	PFDN5
Cluster2	HTT	Cluster2	MAP4K2
Cluster2	EPB41L3	Cluster2	APOD
Cluster3	MAP1A	Cluster2	UBE2I
Cluster3	PRUNE2	Cluster2	NHLRC2
Cluster3	CTTN	Cluster2	TNS3
Cluster3	ANK2	Cluster2	ERLIN2
Cluster3	ANK2	Cluster2	UBXN1
Cluster3	DVL1	Cluster2	GOPC
Cluster3	SNX17	Cluster2	FN3KRP
Cluster3	PRUNE2	Cluster2	SUCLG2
Cluster3	PLEKHA6	Cluster2	HNRNPUL2
Cluster4	VIM	Cluster2	GSTO1
Cluster4	KIAA1522	Cluster2	SPR
Cluster4	KIAA1522	Cluster2	NUDC
Cluster4	ADGRB1	Cluster2	SLC16A7
Cluster4	TNKS1BP1	Cluster2	LMNB2
Cluster4	SYN1	Cluster2	APRT
Cluster4	MLIP	Cluster2	UFL1
Cluster4	WIPF2	Cluster2	RAB12
Cluster4	BAZ1B	Cluster2	RAB21
Cluster4	SYNRG	Cluster2	NME1
Cluster4	HECW1	Cluster2	NUDCD2
Cluster4	PEX5L	Cluster2	PSMA4
Cluster4	PLEKHA6	Cluster2	RBM14
Cluster4	CAMK2G	Cluster2	GNA13
Cluster4	SLC9A6	Cluster2	HNRNPH3
Cluster4	MAP1B	Cluster2	EDF1
Cluster4	SPTBN1	Cluster3	OLA1
Cluster4	PHF24	Cluster3	AGAP2
Cluster4	NAP1L4	Cluster3	EXOG
Cluster4	TIAM1	Cluster3	DYNLL2
Cluster4	SRGAP3	Cluster3	DHX9
Cluster4	CTNND1	Cluster3	PPP1R14A
Cluster4	SHC3	Cluster3	FMNL2
Cluster4	PRR12	Cluster3	MTPN
Cluster4	NGEF	Cluster3	LRPAP1
Cluster4	LRRFIP2	Cluster3	CTTN
Cluster4	ARFGAP2	Cluster3	PPM1E
Cluster4	RANBP1	Cluster3	DCLK1
Cluster4	CTNND2	Cluster3	LRRC59
Cluster4	DGCR8	Cluster3	PSMC5
Cluster4	DPYSL4	Cluster3	CAND1
Cluster4	PRKCA	Cluster3	U2AF2
Cluster4	CKB	Cluster3	KLC1
Cluster4	CAMK1D	Cluster3	CALM3
Cluster4	ITSN2	Cluster3	CKAP5
Cluster4	PURA	Cluster3	DAZAP1
Cluster4	CCDC6	Cluster3	TUBB2A
Cluster4	KANK2	Cluster3	C11orf68
Cluster4	PRUNE2	Cluster3	EXOC8
Cluster4	SRGAP3	Cluster3	HPCA
Cluster4	SLTM	Cluster3	NIT2
Cluster4	SORBS1	Cluster3	SKP1
Cluster4	ATP2B1	Cluster3	CAMK1
Cluster4	APBA2	Cluster3	BSG
Cluster4	HDLBP	Cluster3	MT-CO1
Cluster4	SV2A	Cluster3	MAP1LC3A
Cluster4	HECW1	Cluster3	MCTS1
Cluster4	CAMSAP3	Cluster3	DNM1L
Cluster4	CLINT1	Cluster3	CTNND1
Cluster4	ABLIM1	Cluster3	GSK3B
Cluster4	EPB41L1	Cluster3	BASP1
Cluster4	EPB41L3	Cluster3	PFKM
Cluster4	WDR47	Cluster3	STRAP
Cluster4	ATP2B2	Cluster3	AGK
Cluster4	PLEKHA5	Cluster3	CYB5R1
Cluster4	KCNQ5	Cluster4	ACIN1
Cluster4	KIAA1549L	Cluster4	ARFIP1
Cluster4	DSP	Cluster4	MAT2B
Cluster4	EPB41L3	Cluster4	JAM2
Cluster4	FN1	Cluster4	ACAA1
Cluster4	CTNND1	Cluster4	ABL2
Cluster4	VIM	Cluster4	ARL8A
Cluster4	CTNND2	Cluster4	ADO
Cluster4	TTC7B	Cluster4	FABP5
Cluster4	STX1A	Cluster5	GPD2
Cluster4	VIM	Cluster5	GNB1
Cluster4	AHNAK	Cluster5	NCK2
Cluster4	ATG2B	Cluster5	RPS19
Cluster4	PACSIN1	Cluster5	HNRNPH2
Cluster4	VCPIP1	Cluster5	DNAJC7
Cluster4	PIK3C2A	Cluster5	WDR82
Cluster4	PRKCG	Cluster5	CORO1C
Cluster4	KCNB1	Cluster5	PPP2R2D
Cluster4	EPB41L3	Cluster5	LMAN2
Cluster4	GRIP1	Cluster5	KIF3B
Cluster4	TBC1D1	Cluster5	ABHD16A
Cluster4	PDE4B	Cluster5	VPS26A
Cluster4	ACACA	Cluster5	MEAK7
Cluster4	NAV1	Cluster5	ATG5
Cluster4	MAPRE2	Cluster6	NIPSNAP3B
Cluster4	CASKIN1	Cluster6	GAP43
Cluster4	HDAC4	Cluster6	ABCC4
Cluster4	EPB41L3	Cluster6	SLC32A1
Cluster4	CAMK2A	Cluster6	APOOL
Cluster4	ARFGEF2	Cluster6	MTX2
Cluster4	CAMK2G	Cluster6	EXOC3
Cluster4	ZDHHC5	Cluster6	NLN
Cluster4	KBTBD11	Cluster6	ACADSB
Cluster4	PRKAR2A	Cluster6	EIF4G1
Cluster4	SLC12A5	Cluster6	ADAM11
Cluster4	CDH22	Cluster6	SDHD
Cluster4	BASP1	Cluster6	TRIM3
Cluster4	DCAF6	Cluster6	TOMM5
Cluster4	PPFIBP1	Cluster6	APBA2
Cluster4	EPB41L1	Cluster7	RPL30
Cluster4	VIM	Cluster7	PFKP
Cluster4	VCPIP1	Cluster7	NBEA
Cluster4	VCPIP1	Cluster7	EPB41L1
Cluster4	PKP2	Cluster7	PSPC1
Cluster4	NUAK1	Cluster7	TUBB3
Cluster4	MAP1B	Cluster7	STXBP5L
Cluster4	CCDC92	Cluster7	ATP6V1B2
Cluster4	STX7	Cluster7	ACTG1
Cluster4	ARHGAP32	Cluster7	ATP6V1A
Cluster4	ABLIM1	Cluster7	EXOC7
Cluster4	CAMKV	Cluster7	ACO2
Cluster4	MAP2	Cluster7	LRP1
Cluster4	SCN1A	Cluster7	IMMT
Cluster4	KNDC1	Cluster7	NIPSNAP1
Cluster4	SH3KBP1	Cluster7	GOT2
Cluster4	ZFAND5	Cluster7	ACSF3
Cluster4	MYCBP2	Cluster7	SNAP25
Cluster4	CAMK2G	Cluster7	SPTAN1
Cluster4	SPTBN2	Cluster7	IDH2
Cluster4	RAB11FIP5	Cluster7	ROCK2
Cluster4	CAMK2A	Cluster7	CLTC
Cluster4	CAMK2B	Cluster7	CYCS
Cluster4	CAMK2B	Cluster7	STXBP1
Cluster4	SRC	Cluster7	PSMD1
Cluster4	FRMD4A	Cluster7	CAP2
Cluster4	FAM131B	Cluster7	DNM3
Cluster4	PRR12	Cluster7	RPS16
Cluster5	SLC4A4	Cluster7	SPTBN1
Cluster5	STX7	Cluster7	ATL1
Cluster5	CAMK2G	Cluster7	VPS16
Cluster5	HDLBP	Cluster7	TPPP
Cluster5	PDE4B	Cluster7	LUM
Cluster5	ZRANB2	Cluster7	RPS13
Cluster5	NRCAM	Cluster7	PRKCA
Cluster5	MAP1B	Cluster7	ANXA4
Cluster5	CEP170	Cluster7	HNRNPA3
Cluster5	DPYSL5	Cluster7	THAP4
Cluster5	SPP1	Cluster7	THY1
Cluster5	SPP1	Cluster7	MYL1
Cluster5	SPP1	Cluster7	EEF1A2
Cluster5	SHANK1	Cluster7	PHB2
Cluster5	NEMF	Cluster7	VIM
Cluster5	KCTD16	Cluster7	RRAS
Cluster5	RALBP1	Cluster7	ATP1A3
Cluster5	MAP1A	Cluster7	EPDR1
Cluster5	ATP1A1	Cluster7	UNC13A
Cluster6	MFF	Cluster7	GNAO1
Cluster6	EIF3CL	Cluster7	FMOD
Cluster6	WASHC2A	Cluster7	HBA1;HBA2
Cluster6	ANK3	Cluster7	PRMT1
Cluster6	GPR34	Cluster7	ANXA2
Cluster6	MRE11	Cluster7	PRRT2
Cluster6	MRE11	Cluster7	BGN
Cluster6	SPP1	Cluster7	CHCHD3
Cluster6	PPP1R14A	Cluster7	EIF4A2
Cluster6	SPP1	Cluster7	NIPSNAP2
Cluster6	CCP110	Cluster7	F13A1
Cluster6	GPATCH2	Cluster7	CNTNAP2
Cluster6	FAM234B	Cluster7	SDHA
Cluster6	SPP1	Cluster7	YWHAZ
Cluster6	ESF1	Cluster7	PPP6C
Cluster6	AKAP12	Cluster7	PKP2
Cluster6	TCEAL3	Cluster7	PURA
Cluster6	HDAC5	Cluster7	PPT1
Cluster6	CBR1	Cluster7	OGN
Cluster6	MCF2L	Cluster7	CHCHD6
Cluster6	MCF2L	Cluster7	CACNB4
Cluster6	EIF3D	Cluster7	PRELP
Cluster6	ST13	Cluster7	FAM81A
Cluster6	SPP1	Cluster8	GSTM1
Cluster6	SCAF1	Cluster8	CHDH
Cluster6	CFL2	Cluster8	GMDS
Cluster6	GPATCH2	Cluster8	CRABP1
Cluster6	SPP1	Cluster8	YWHAG
Cluster6	SPP1	Cluster8	RAB1B
Cluster6	PTGES3	Cluster8	KALRN
Cluster6	MATR3	Cluster8	SSBP1
Cluster6	RTKN	Cluster8	PPIF
Cluster6	PHRF1	Cluster8	COA3
Cluster6	AAGAB	Cluster8	IFIT1
Cluster6	EIF5B	Cluster8	DCXR
Cluster6	AAGAB	Cluster8	APOL2
Cluster6	PIP5K1C	Cluster8	STMN1
Cluster6	GIT1	Cluster8	NDUFAF3
Cluster6	NFASC	Cluster8	UBA52
Cluster6	CLTA	Cluster8	NONO
Cluster6	BRD3	Cluster8	AK3
Cluster6	XPC	Cluster8	SUB1
Cluster6	XPC	Cluster8	PSME3
Cluster6	NEFH	Cluster8	ALDH5A1
Cluster6	PLCB1	Cluster8	VPS13C
Cluster6	ADRA2A	Cluster8	GNB2
Cluster6	SPP1	Cluster8	YWHAB
Cluster6	ZNF704	Cluster8	DUT
Cluster6	KIAA1109	Cluster8	ASS1
Cluster6	TPRG1L	Cluster8	ATP5F1E
Cluster6	PRUNE2	Cluster8	PPP1CA
Cluster6	TUBA3D	Cluster8	NEBL
Cluster6	USP20
Cluster6	USP20
Cluster6	SUDS3
Cluster6	WDR13
Cluster6	FDX1
Cluster6	PPP1R14A
Cluster6	ARGLU1
Cluster7	ERMN
Cluster7	TUBB4A
Cluster7	TUBB
Cluster7	OXR1
Cluster7	DEK
Cluster7	FKBP15
Cluster7	ERMN
Cluster7	SRRM1
Cluster7	SRRM1
Cluster7	SRRM2
Cluster7	NEFM
Cluster7	MAP1A
Cluster7	SYNGR3
Cluster8	PCM1
Cluster8	MAP7D1
Cluster8	YWHAB
Cluster8	BYSL
Cluster8	DDX20
Cluster8	ADD2
Cluster8	DYRK1A
Cluster8	GPRIN3
Cluster8	PAK1
Cluster8	TAB3
Cluster8	MAP1B
Cluster8	RABL6
Cluster8	SRRM2
Cluster8	KIF3A
Cluster8	SMARCC2
Cluster8	KIF3A
Cluster8	PPP6R1
Cluster8	SMIM13
Cluster8	FBXW9
Cluster8	MARCKS
Cluster8	DBN1
Cluster8	SMIM13
Cluster8	SMIM13
Cluster8	KCNQ2
Cluster8	SORT1
Cluster8	PDCD5
Cluster8	POLR2F
Cluster8	CLINT1
Cluster8	RETREG3
Cluster8	FBXO2
Cluster8	FBXO2
Cluster8	FSD1
Cluster8	STARD10
Cluster8	STK39
Cluster8	AKAP12
Cluster8	LEO1
Cluster8	EPN1
Cluster8	SGTA
Cluster8	SGTA
Cluster8	PPP1R2
Cluster8	TNIK
Cluster8	KBTBD11
Cluster8	KBTBD11
Cluster8	MAP1A
Cluster8	ANK2
Cluster8	SUDS3
Cluster8	PPME1
Cluster8	MBP
Cluster8	VIRMA
Cluster8	SPP1
Cluster8	MAP1A
Cluster8	NEFM
Cluster8	ABCA2
Cluster8	CAND1
Cluster8	CAND1
Cluster8	TRIM33
Cluster8	SPP1
Cluster8	ABCA2
Cluster8	TUBB4A
Cluster8	TUBB
Cluster8	MYO18A
Cluster8	DCAF6
Cluster8	DCAF6
Cluster8	CRYAB
Cluster8	ANK3
Cluster8	BCLAF1
Cluster8	CBR3
Cluster8	ERMN
Cluster8	YWHAG
Cluster8	ABCF1
Cluster8	DPYSL5
Cluster8	NEFM
Cluster8	NEFM
Cluster8	LIPE
Cluster8	APLP2
Cluster8	EIF5B
Cluster8	APLP2
Cluster8	MAP1A
Cluster8	OSBP
Cluster8	OSBP
Cluster8	DPYSL2
Cluster8	DPYSL2
Cluster8	FMNL2
Cluster8	HNRNPUL2
Cluster8	YWHAZ
Cluster8	SEPTIN4
Cluster8	NEFM
Cluster8	SPP1
Cluster8	HNRNPUL2
Cluster8	CNP
Cluster8	SPP1
Cluster8	SPP1
Cluster8	SPP1
Cluster8	RPAP3
Cluster8	SPP1
Cluster8	SPP1
Cluster8	NCL
Cluster8	TUBB4A
Cluster8	CADPS
Cluster8	SIRT2
Cluster8	CRYAB
Cluster8	ABCA2
Cluster8	CLDN11
Cluster8	SIRT2
Cluster8	ESF1
Cluster8	MAP1A
Cluster8	ANKRD13D
Cluster8	PPP1R14A
Cluster8	PPP1R7
Cluster8	PPP1R7
Cluster8	BCAS1
Cluster8	PLP1
Cluster8	TJP2
Cluster8	SPINDOC
Cluster8	SPP1
Cluster8	ERMN
Cluster8	ANK3
Cluster8	NFASC
Cluster8	STT3B
Cluster8	STT3B
Cluster8	FAM234B
Cluster8	SLC2A11
Cluster8	PCNP
Cluster8	MAP1A
Cluster8	DCLK1
Cluster8	IGFBP5
Cluster8	PWP1
Cluster8	PWP1
Cluster8	SRRM2
Cluster8	MBP
Cluster8	SPP1
Cluster8	RIC8A
Cluster8	RIC8A
Cluster8	TP53BP1
Cluster8	MBP
Cluster8	MAP1A
Cluster8	PRPF4B
